# Supplementary material for: A review of whole cell wall NMR by the direct-dissolution of biomass
Source: Royal Society of Chemistry journal article supplement (doi:10.1039/c5gc02828k), 2016-01-01
Supplement: c5gc02828k1.pdf [file c5gc02828k1.pdf]

## Whole Plant Cell Wall NMR with Ionic Liquids: A Powerful Tool in Biofuel Research

Marcus Foston<sup>1,2,\*</sup>, Reichel Samuel<sup>3</sup>, Jian He<sup>2</sup>, and Arthur J. Ragauskas<sup>1,3,4</sup>

<sup>1</sup>*BioEnergy Science Center*

<sup>2</sup>*Washington University in St. Louis, Department of Energy, Environmental & Chemical Engineering, St. Louis, MO, USA*

<sup>3</sup>*Georgia Institute of Technology, School of Chemistry and Biochemistry, Institute of Paper Science and Technology, Atlanta, GA, USA*

<sup>4</sup>*Department of Chemical and Biomolecular Engineering, Department of Forestry, Wildlife, and Fisheries, University of Tennessee, Knoxville, TN, USA*

**Supplementary Table 1** Represents the typical chemical shift assignments of 1D <sup>13</sup>C NMR spectra of biomass in DMSO-d<sub>6</sub>.

| Assignments                                                                                    | <sup>13</sup> C Chemical Shift (ppm) |
|------------------------------------------------------------------------------------------------|--------------------------------------|
| C=O in $\phi$ -COOH                                                                            | 179-173                              |
| C=O in $\phi$ -COOR                                                                            | 167-168                              |
| C=O in Ar-C=C-COOR                                                                             | 168-166                              |
| H <sub>4</sub>                                                                                 | 164-158                              |
| G <sub>3/4</sub> , S <sub>3/5</sub> , and C <sub><math>\alpha</math></sub> in Cinnamate        | 157-140                              |
| S <sub>1/4</sub> and G <sub>1</sub>                                                            | 140-123                              |
| G <sub>6</sub>                                                                                 | 123-117                              |
| H <sub>3/5</sub> , G <sub>5</sub> , C <sub><math>\beta</math></sub> in Cinnamate               | 117-113                              |
| G <sub>2</sub>                                                                                 | 113-110                              |
| S <sub>2,6</sub>                                                                               | 110-106                              |
| C <sub>1</sub> in Cellulose and Hemicellulose                                                  | 105-98                               |
| C <sub>2,3,4,5</sub> in Cellulose, C <sub>2,3,4</sub> in Hemicellulose, and Lignin Side Chains | 94-65                                |
| C <sub>6</sub> in Cellulose, C <sub>5</sub> in Hemicellulose, and Lignin Side Chains           | 65-58                                |
| Methoxy                                                                                        | 57-54                                |
| Acetate-Methyl                                                                                 | 22-20                                |
